# Supplementary material for: Integrative analysis of genome-wide association studies identifies novel loci associated with neuropsychiatric disorders
Source: PubMed Central journal article supplement (PMC7820351; doi:10.1038/s41398-020-01195-5), 2021-01-21

## Supplementary material

**Supplementary Table 1.** The five cohorts of European ancestry for the five neuropsychiatric disorders downloaded from the website of Psychiatric Genomics Consortium (PGC).

| Disease | Case   | Control | Cohort name                               | PMID     |
|---------|--------|---------|-------------------------------------------|----------|
| ADHD    | 19099  | 34194   | European-Ancestry-GWAS                    | 30478444 |
| ASD     | 18381  | 27969   | ASD iPSYCH – PGC GWAS – 2017 (publ. 2019) | 30804558 |
| BIP     | 20352  | 31358   | BIP 2018                                  | 31043756 |
| MDD     | 170756 | 329443  | 2019 PGC UKB Depression Genome-wide       | 30718901 |
| SCZ     | 33640  | 43456   | EUR                                       | 31740837 |

Disease= each neuropsychiatric disorder in the study, ADHD= attention deficit hyperactivity disorder, ASD= autism spectrum disorder, BIP= bipolar disorder, MDD= major depressive disorder, SCZ= schizophrenia; Case= the number of cases in each study; Control= the number of controls in each study; Cohort name= the name of the link to the GWAS cohort on PGC website; PMID= PubMed Unique Identifier of the original publication of each cohort.

**Supplementary Figure 1.** Quantile-quantile (QQ) plot of summary statistics for multi-trait joint analysis and meta-analysis of five neuropsychiatric diseases: MTAG analysis of ADHD (A), ASD (B), BIP (C), MDD (D), SCZ (E), and METAL analysis of five disorders (F). The standardized genomic inflation factor of each analysis was indicated in the figure.

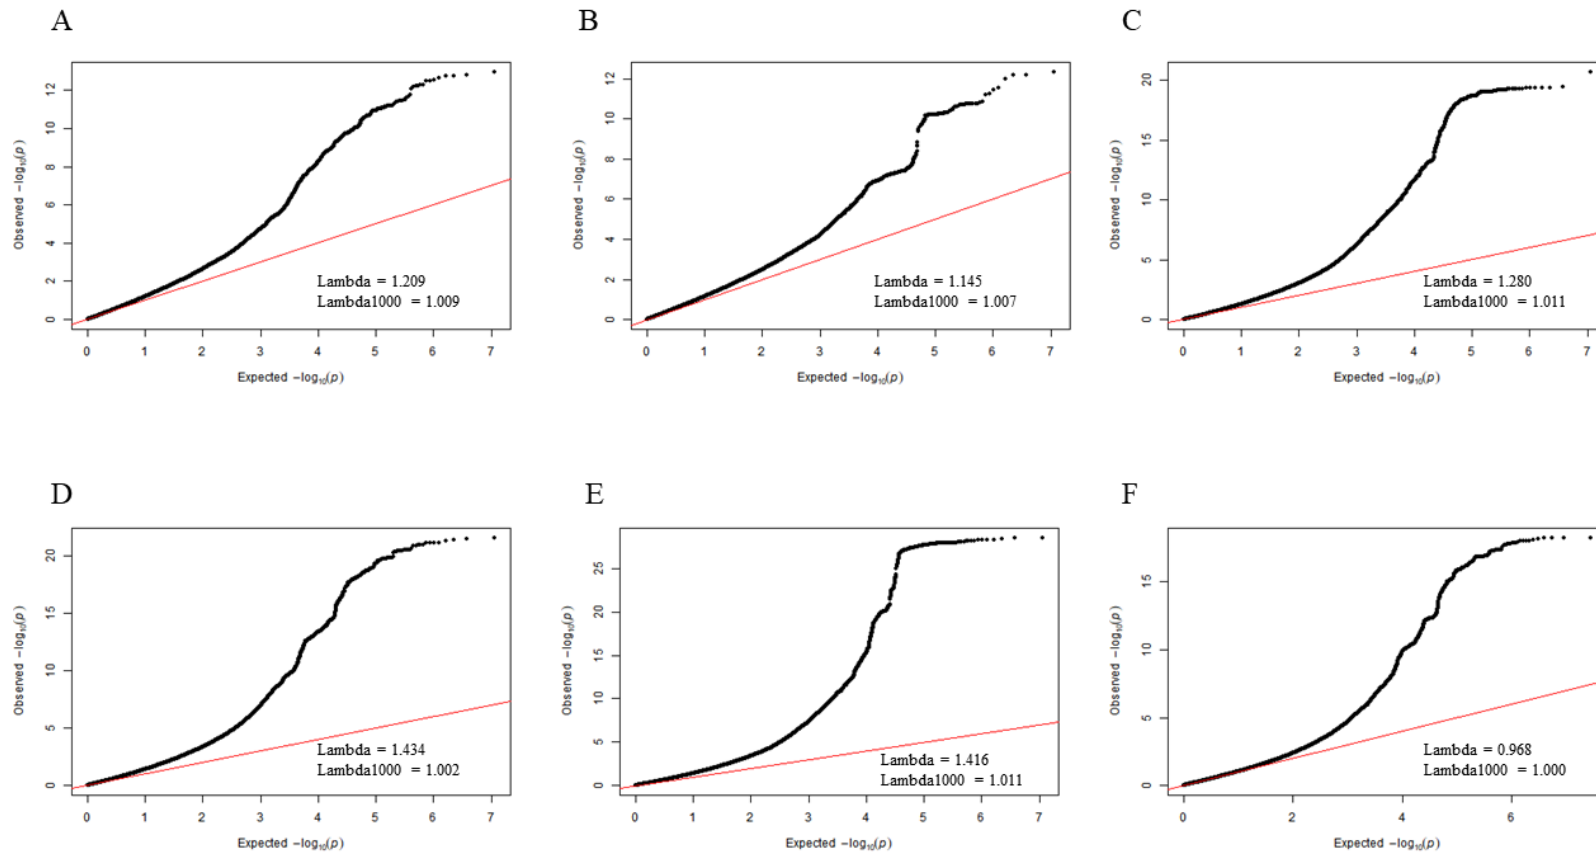

**Supplementary Figure 2.** Regional association plots of novel significant loci from multi-trait joint analyses.

Regional association plots showing the novel significant loci identified from multi-trait joint analyses of ADHD (**A**), BIP (**B**) and MDD (**C**). The genomic position of each SNP is shown on the X-axis and the  $-\log_{10}$  (P-values) are shown on the Y-axis. The most significant SNP is indicated in purple color and the rest of the SNPs are shown in different colors corresponding to the linkage disequilibrium with the top associated SNP. The blue vertical line indicates the recombination rate based on the HapMap project.

A

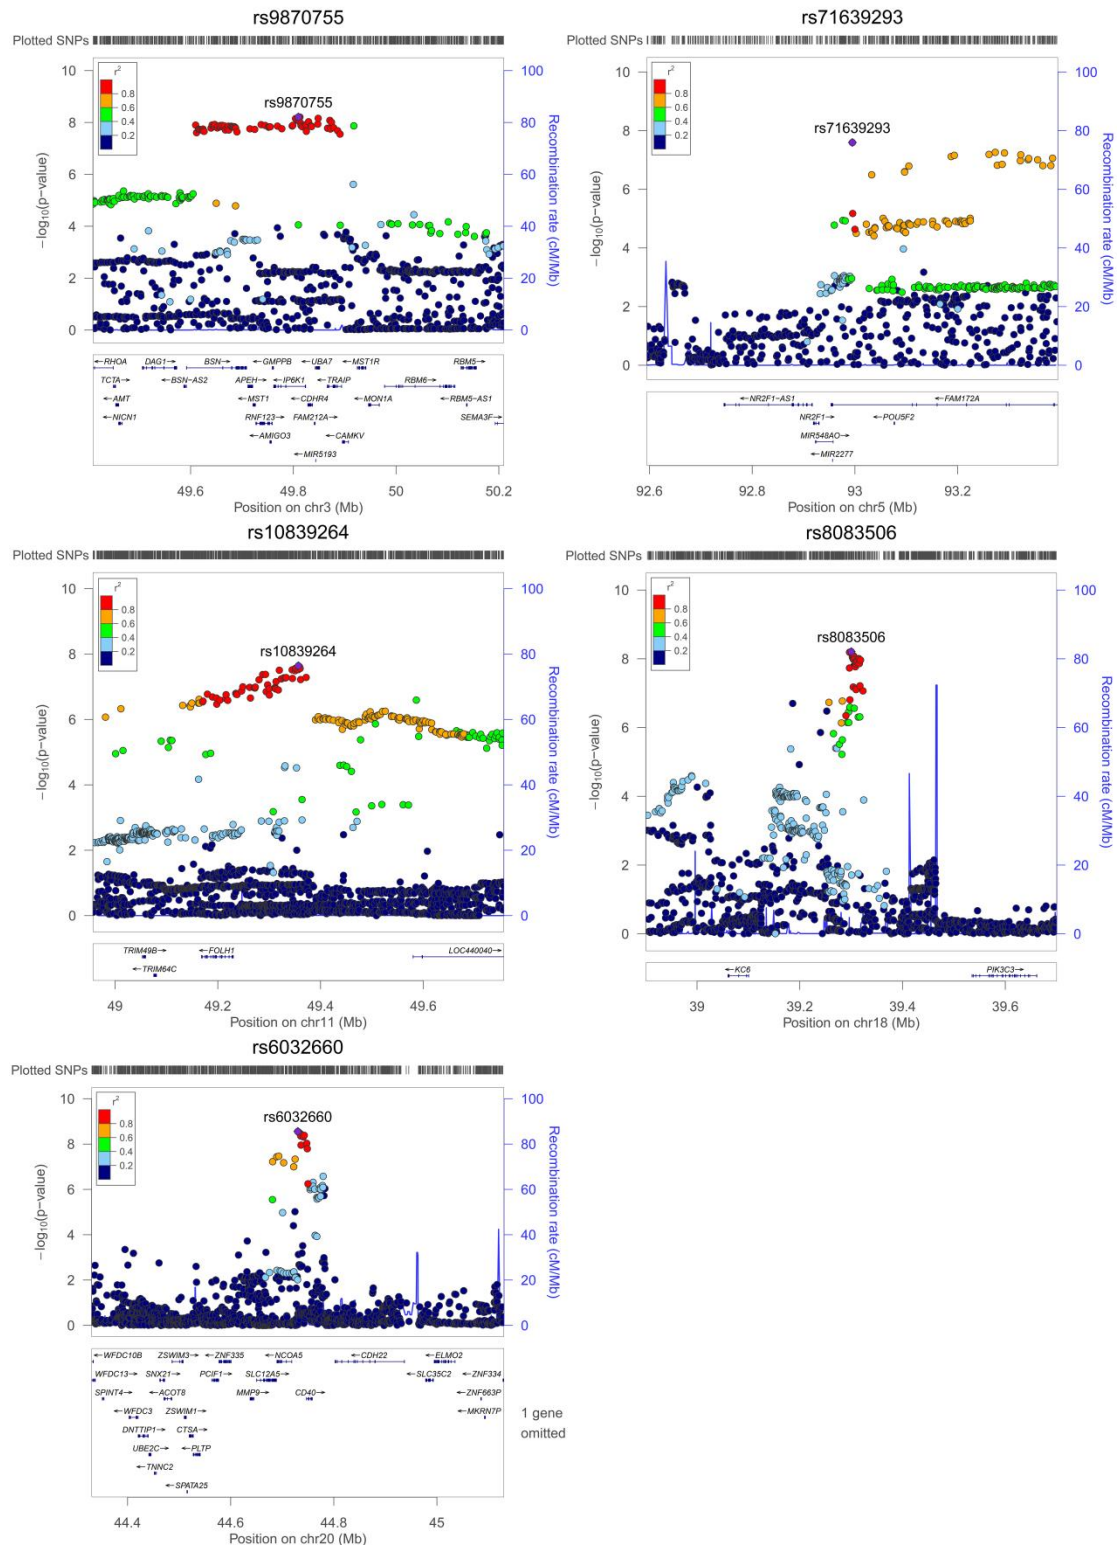

**B**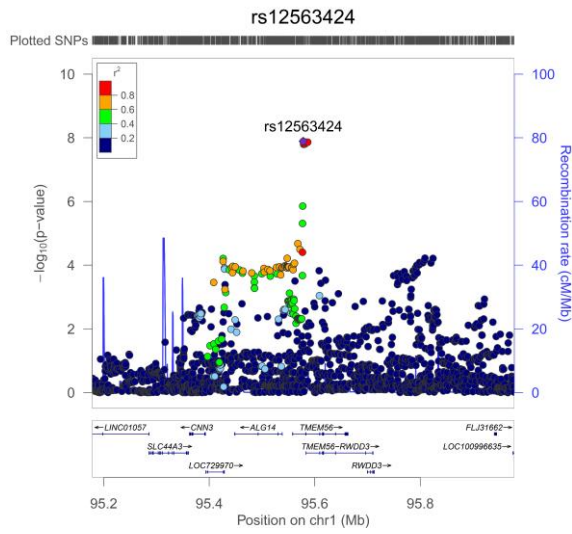**C**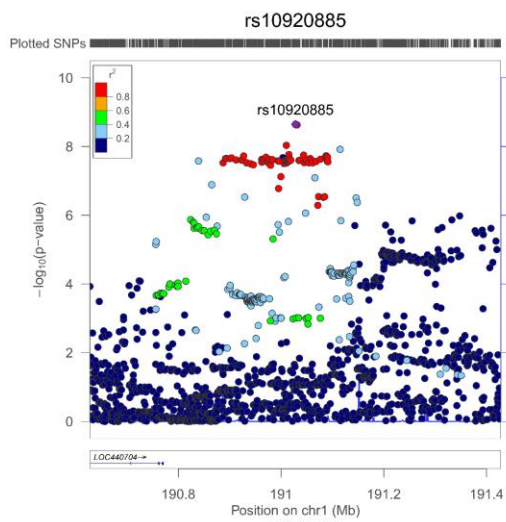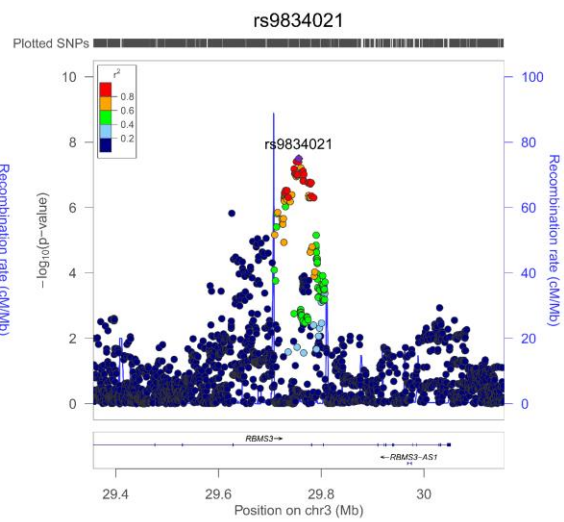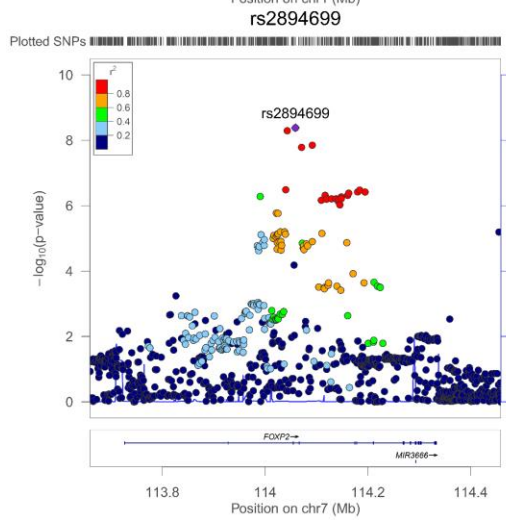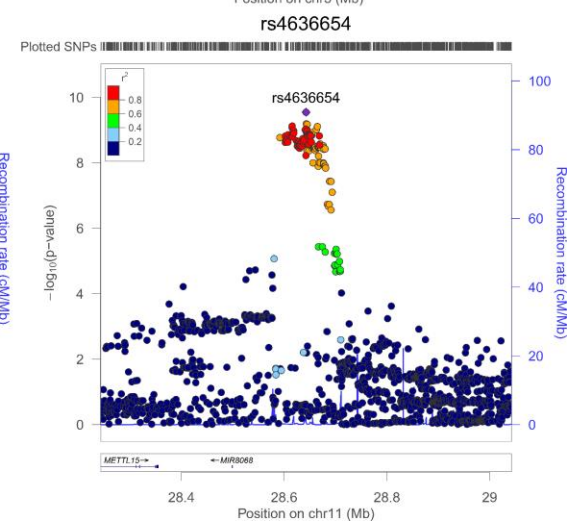

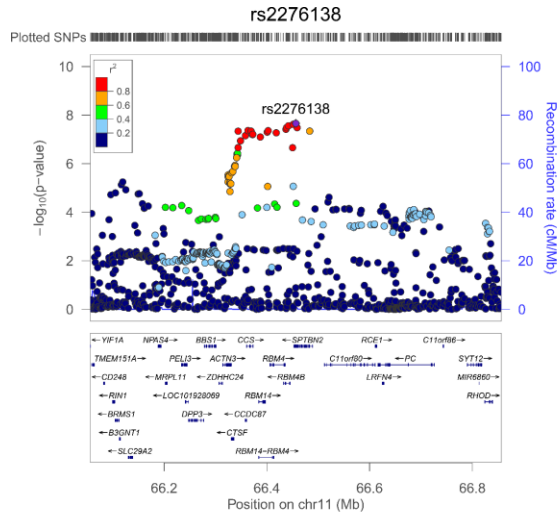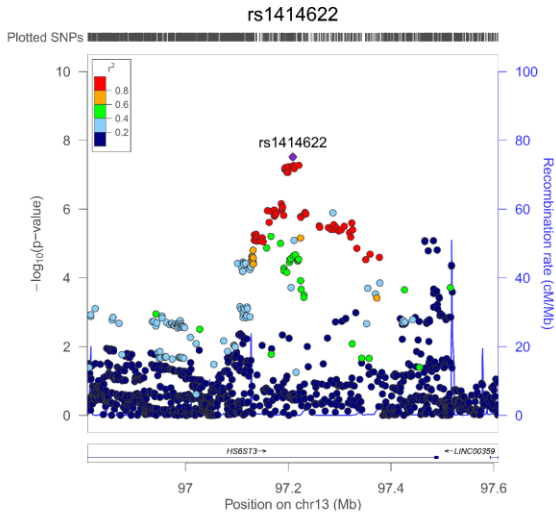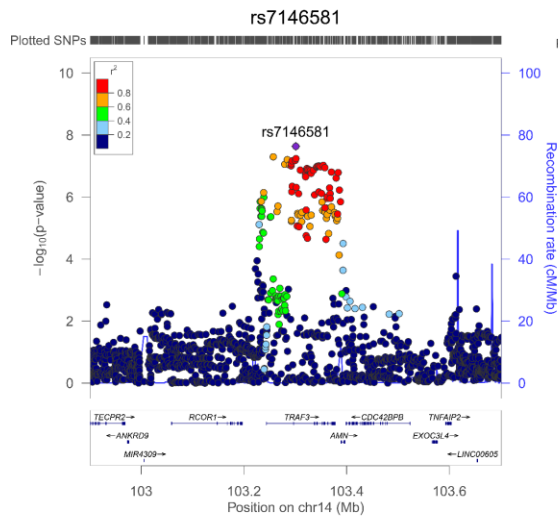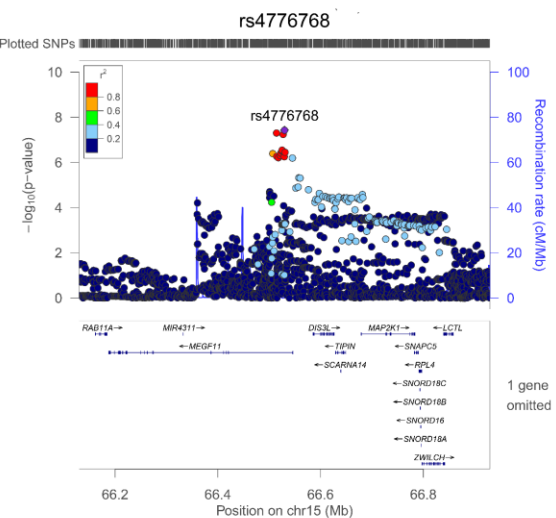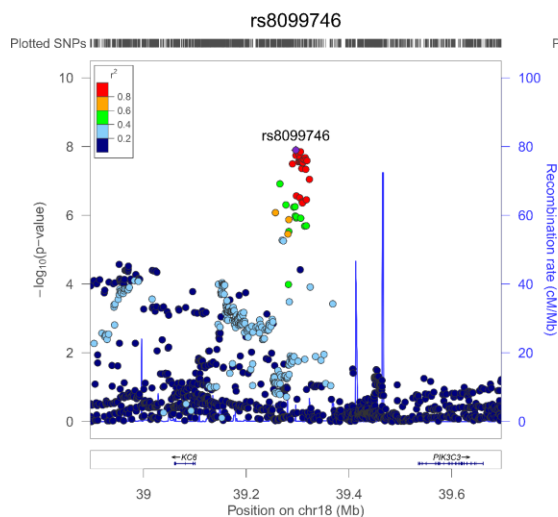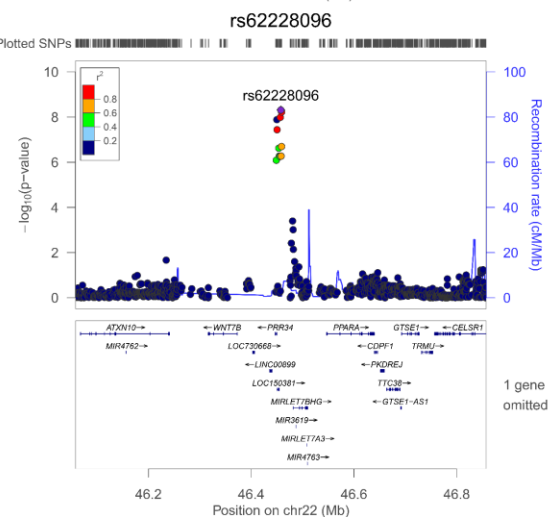

**Supplementary Figure 3.** The forest plots of index SNP at each novel locus demonstrating the P value, log odds ratio (beta) and standard error for each SNP in each disease specific association testing. (A) ADHD; (B) BIP; (C) MDD.

**A**

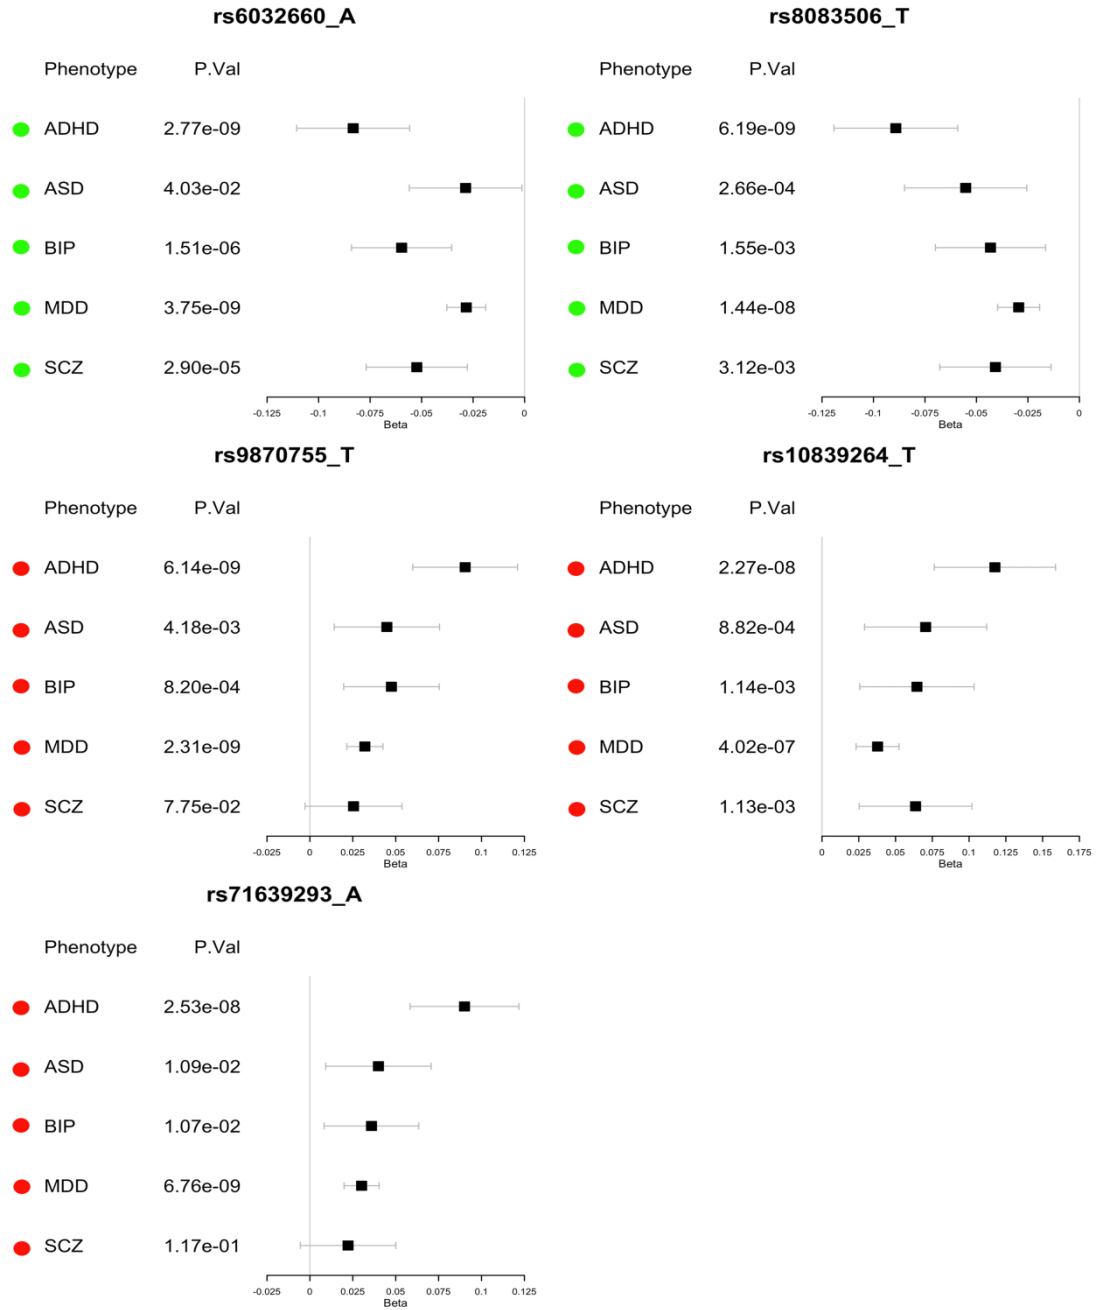

# B

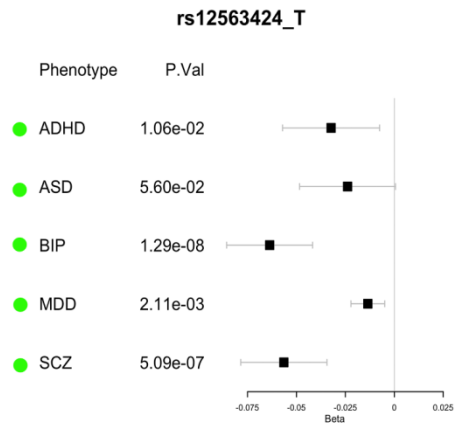



C

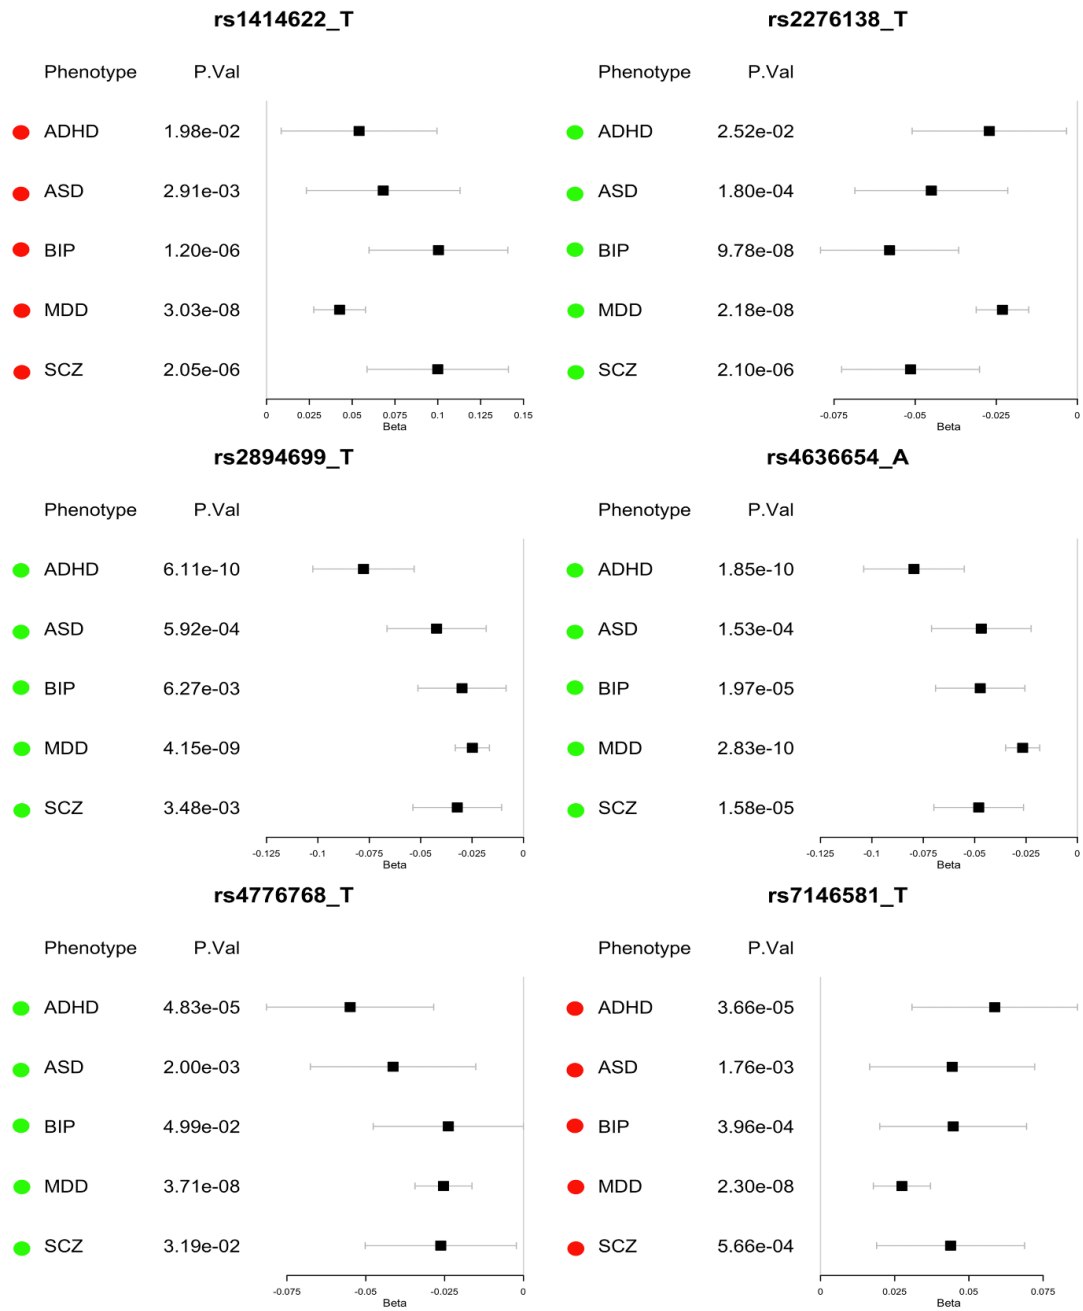

rs8099746\_T

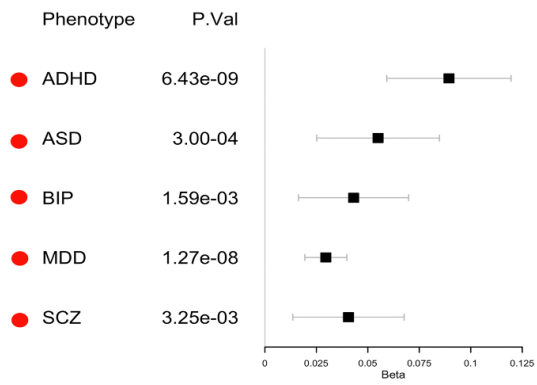

rs9834021\_T

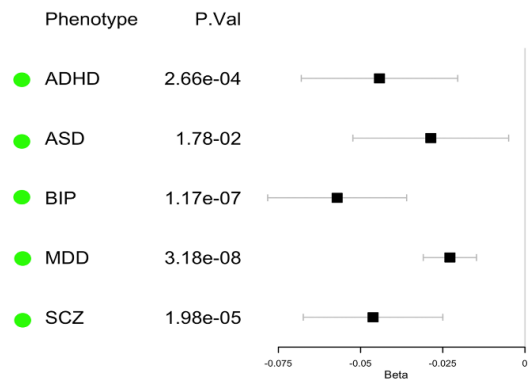

rs10920885\_T

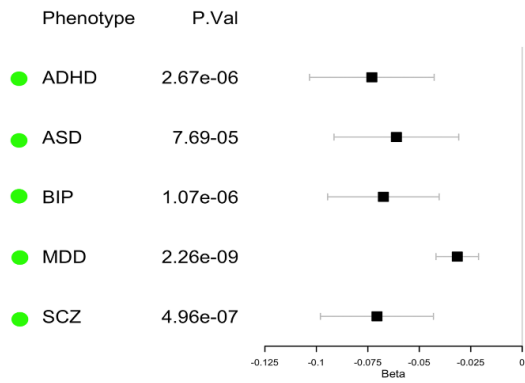

rs62228096\_A

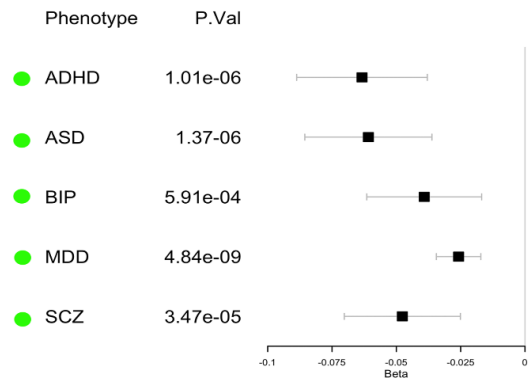

**Supplementary Figure 4.** Regional association plot of the novel significant locus on chromosome 22 in the meta-analysis of five neuropsychiatric disorders.

The regional association plot was generated using the LocusZoom software. The genomic coordinates are plotted on the axis, and the  $-\log_{10}$  P-values of SNPs are shown on the Y-axis. The most significant SNP is indicated in purple and the remaining SNPs are shown in different colors based on linkage disequilibrium with top associated SNP (the color coding legend is indicated in the upper corner of each plot). The blue vertical line indicates the recombination rate based on the HapMap project.

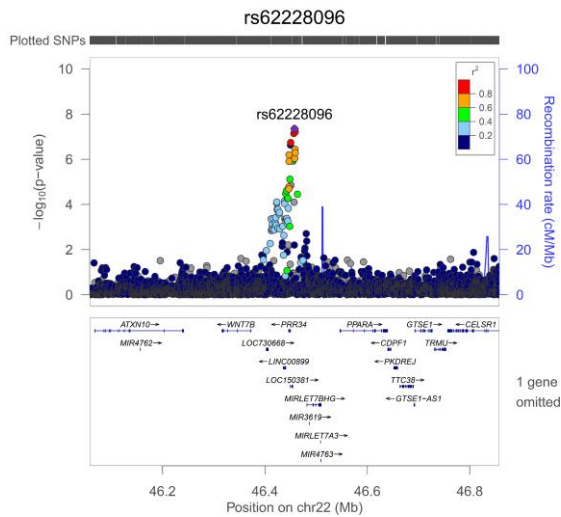

**Supplementary Figure 5.** Circos plots showing chromatin interactions between causal variants and distant genes.

Each causal variant is indicated on the most outer layer. Y-axis are ranged between 0 to the maximum  $-\log_{10}(\text{P-value})$  of the SNPs. The further the SNP is from the center of the circle, the smaller the MTAG P-value is. The dark blue regions on the chromosome ring of the second layer and that of the third layer display the genomic locus where each causal variant is located at. The mapped genes by either chromatin interaction and/or eQTLs are shown on the chromosome ring of the third layer and the links display the chromatin interactions. Genes mapped only by chromatin interactions or only by eQTLs are colored orange or green, respectively. When the gene is mapped by both, it is colored red. (A) ADHD; (B) BIP; (C) MDD.

**A**

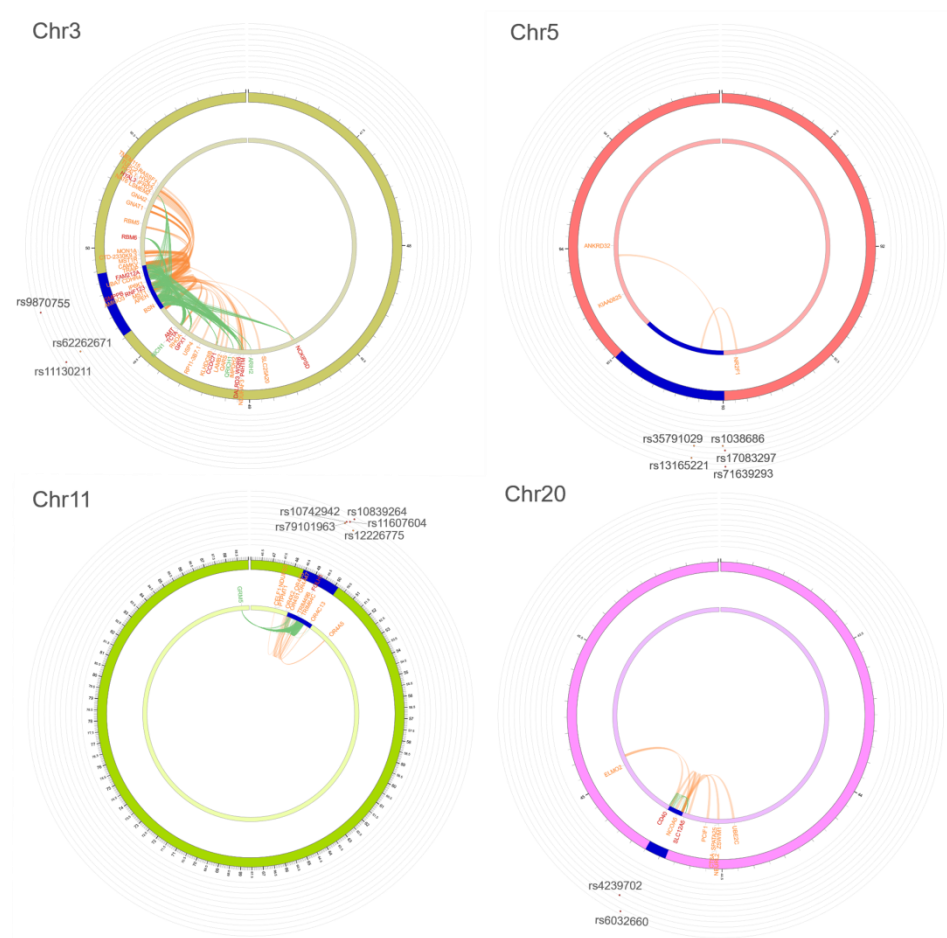

**B**

Chr1

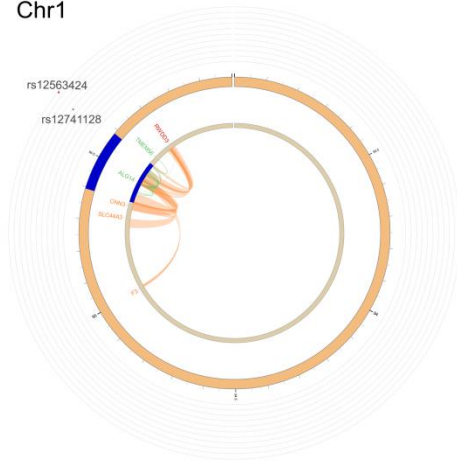

C

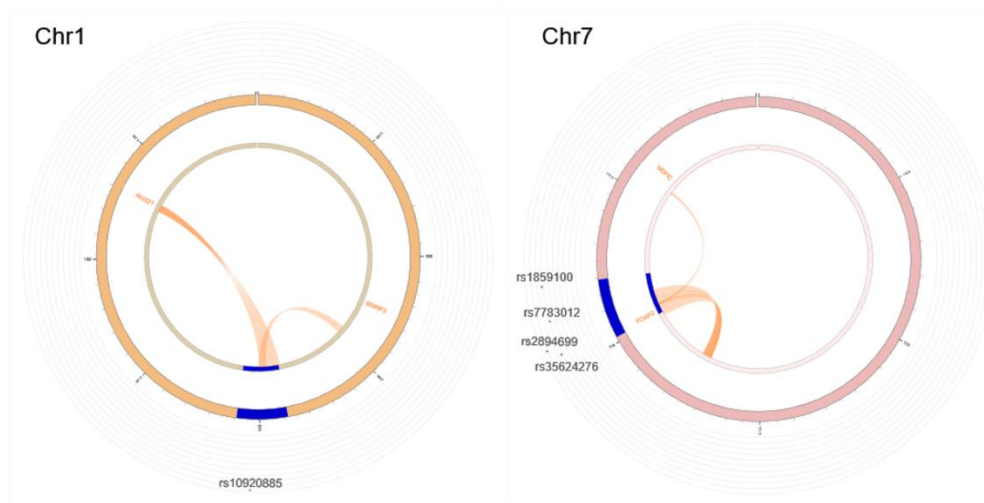

Chr11

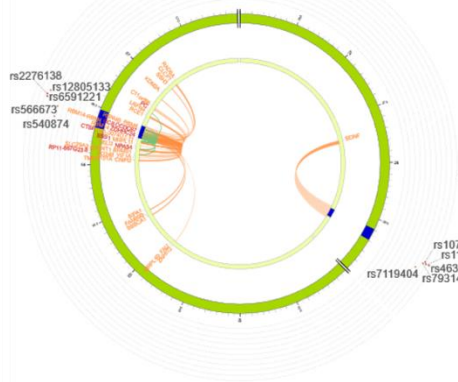

Chr13

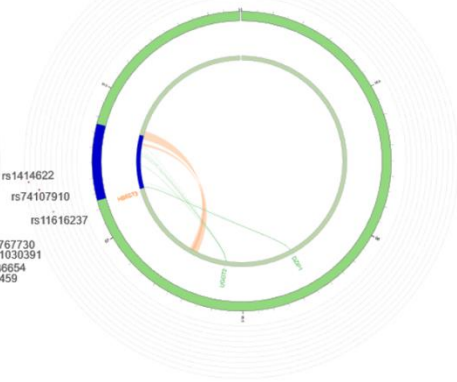

Chr14

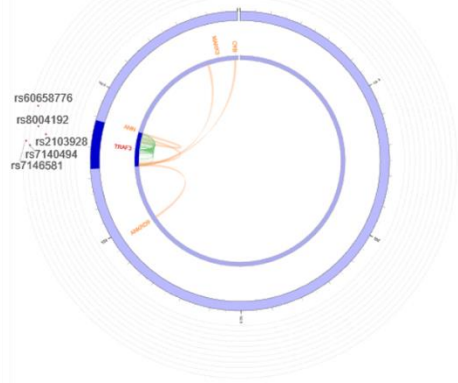

Chr15

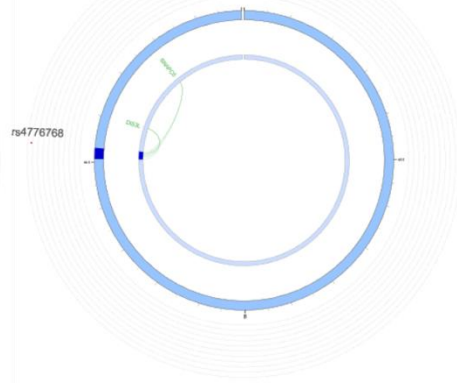

Chr22

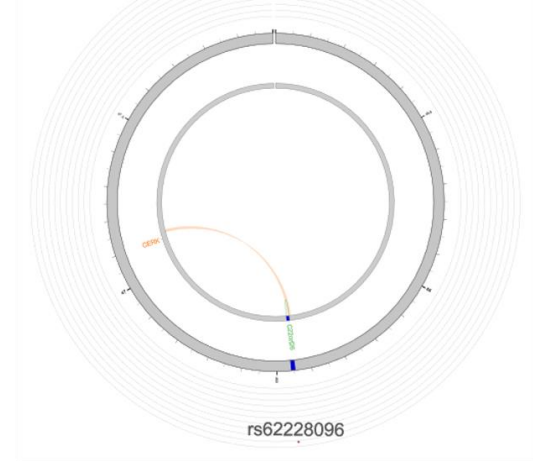

**Supplementary Figure 6.** MAGMA gene expression profile analysis of genes at novel loci identified in MTAG analyses of neuropsychiatric disorders. MAGMA is a generalized gene-set analysis approach, here showing the differentially expressed gene sets **A)** at 29 different ages of human brain samples from BrainSpan.; **B)** at 11 general developmental stages of brain samples from BrainSpan. The ages or developmental stages with significant enrichment of differentially expressed gene sets were colored red. yrs = years; pcw = post conception weeks.

**A**

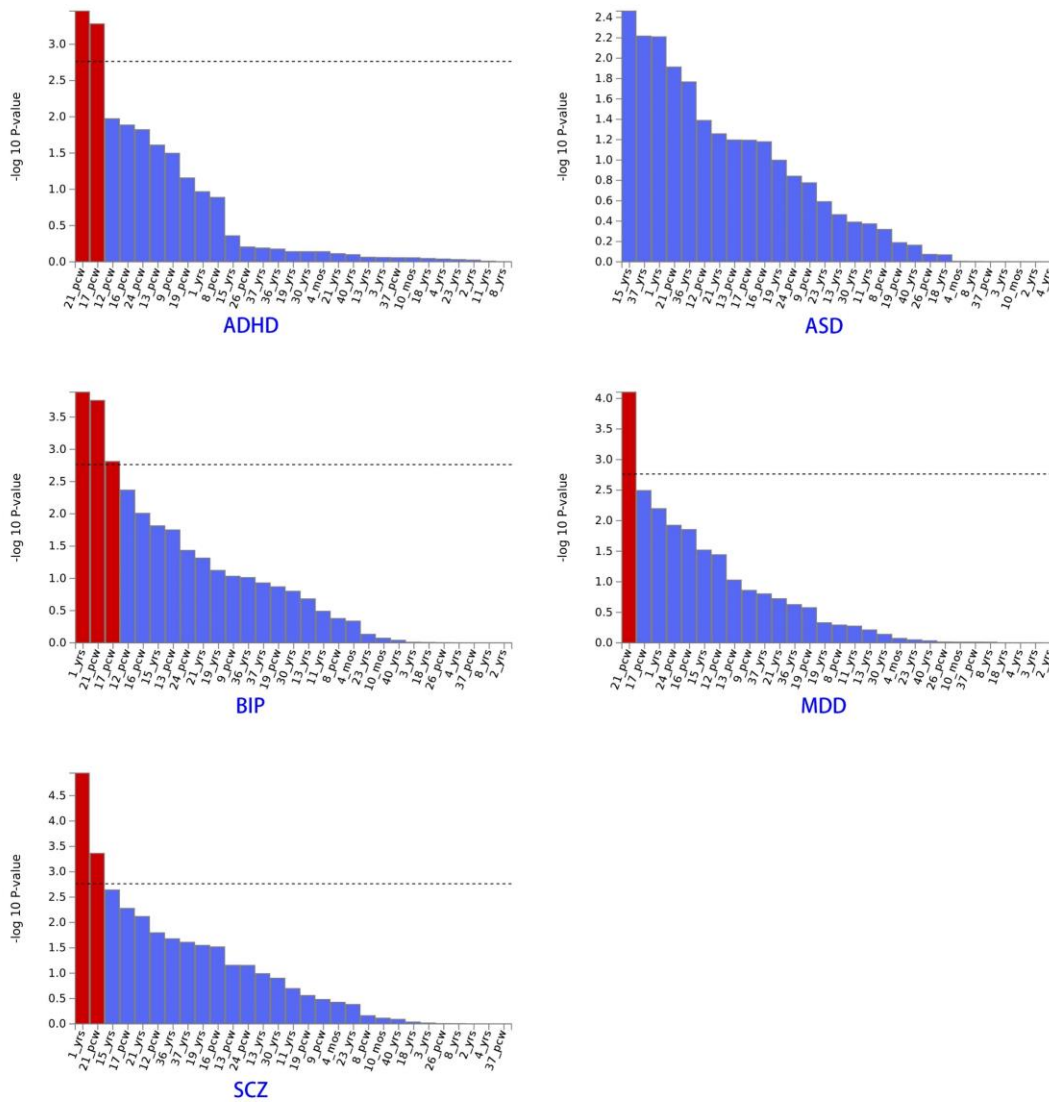

**B**

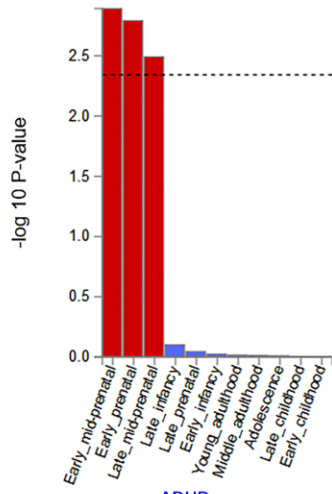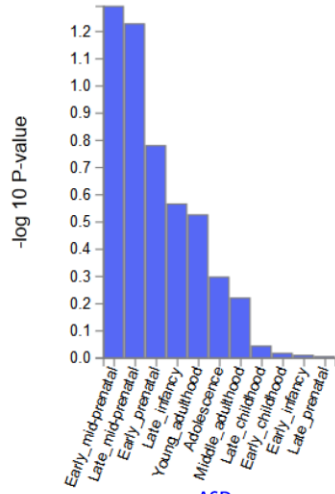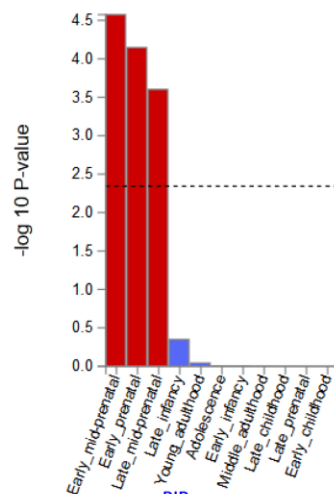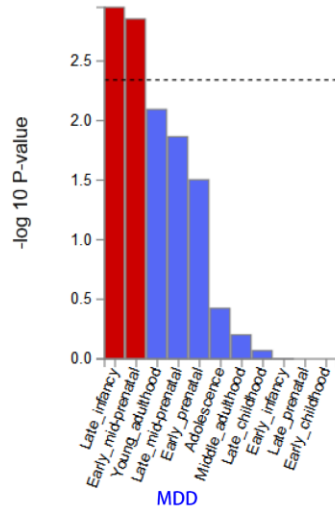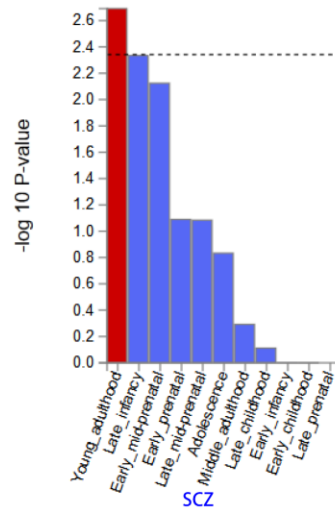



**Supplementary Figure 7.** Estimated heritability of five neuropsychiatric diseases. The liability scale SNP heritability based on MTAG results (MTAG) were compared with estimates from the original GWAS of each cohort (REF) and those from population studies reported in literature (POP). The population prevalence of each disease used in the heritability estimations is ADHD=0.05, ASD= 0.012, BIP=0.02, MDD= 0.302, SCZ= 0.01, which are the same as that in their original GWAS. The population heritability referred to the median value of heritability reported in prior studies in literature (**Supplementary Table 12**).

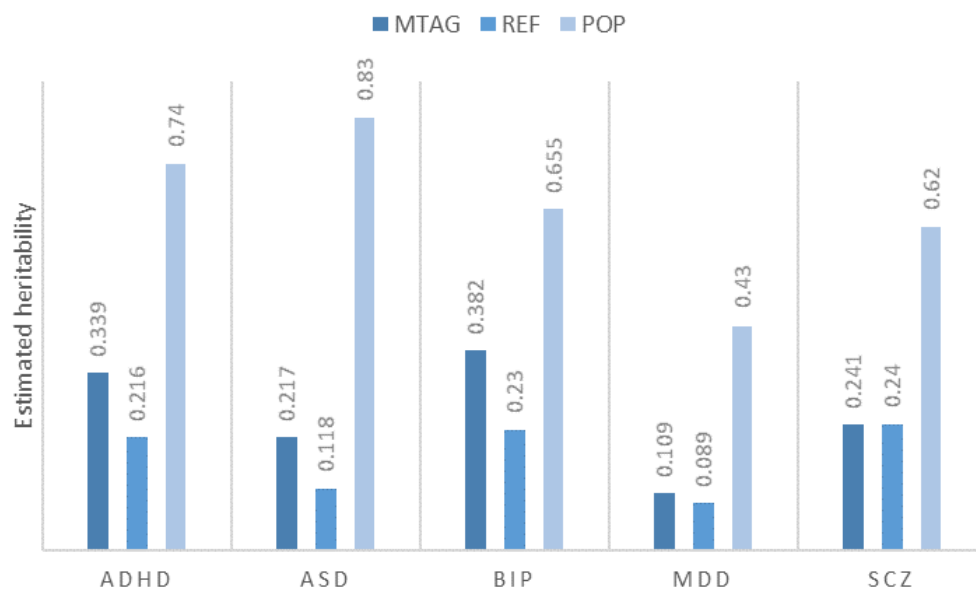

**Supplementary Figure 8.** Genetic correlation between the five neuropsychiatric disorders. The circles representing the five neuropsychiatric disorders, and the width of the line between the circles represents the strength of the pairwise genetic relationships in a positive correlation. All genetic correlations displayed in the schematic diagram were significant ( $P < 0.05$ ).

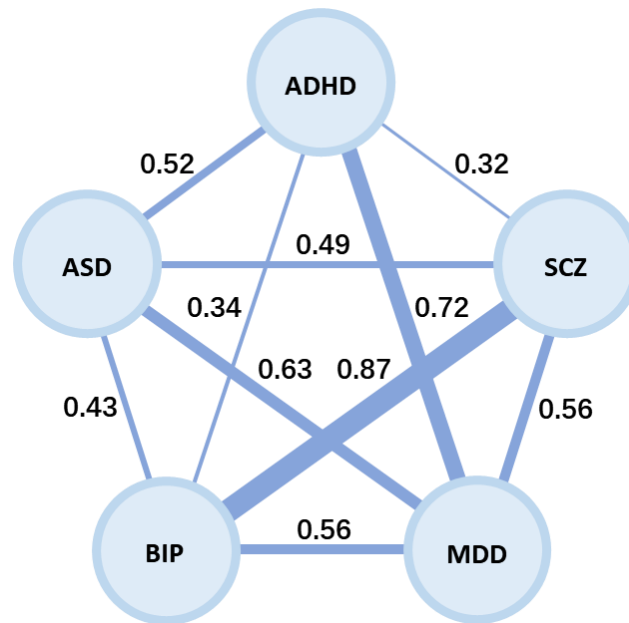

**Supplementary Figure 9.** The QQ-plot of the pediatric replication cohort.

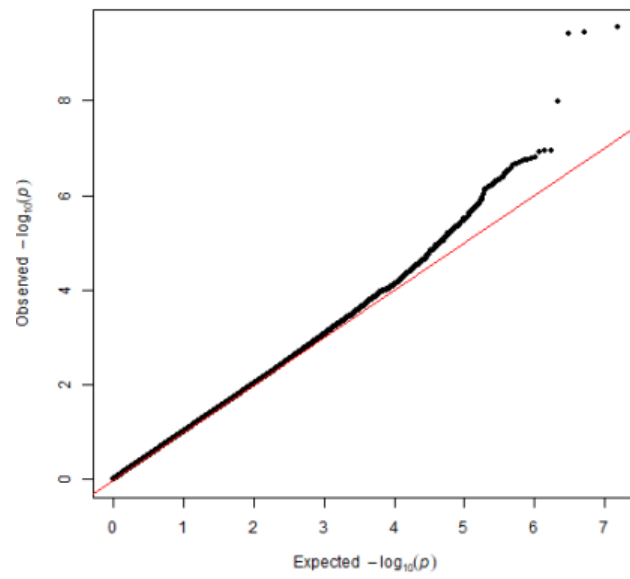

$$\lambda=1.013$$

**Supplementary Figure 10.** Regression plot showing test for correlation of effect size estimates at genome-wide significant loci from ADHD MTAG analysis of 19099 cases and 34194 controls after adjustment for winner's curse and those from the pediatric replication cohort of 2726 ADHD cases and 16321 controls. The effect size estimates from the ADHD MTAG analysis are shown on the X-axis and those from the pediatric replication cohort are indicated on the Y-axis. The blue vertical lines indicate the standard error of the effect size estimates. The color of each dot represents its  $-\log_{10}(p)$  from the ADHD MTAG analysis. The dashed purple line indicates the observed slope of the linear regression between the effect size estimates from the two studies.

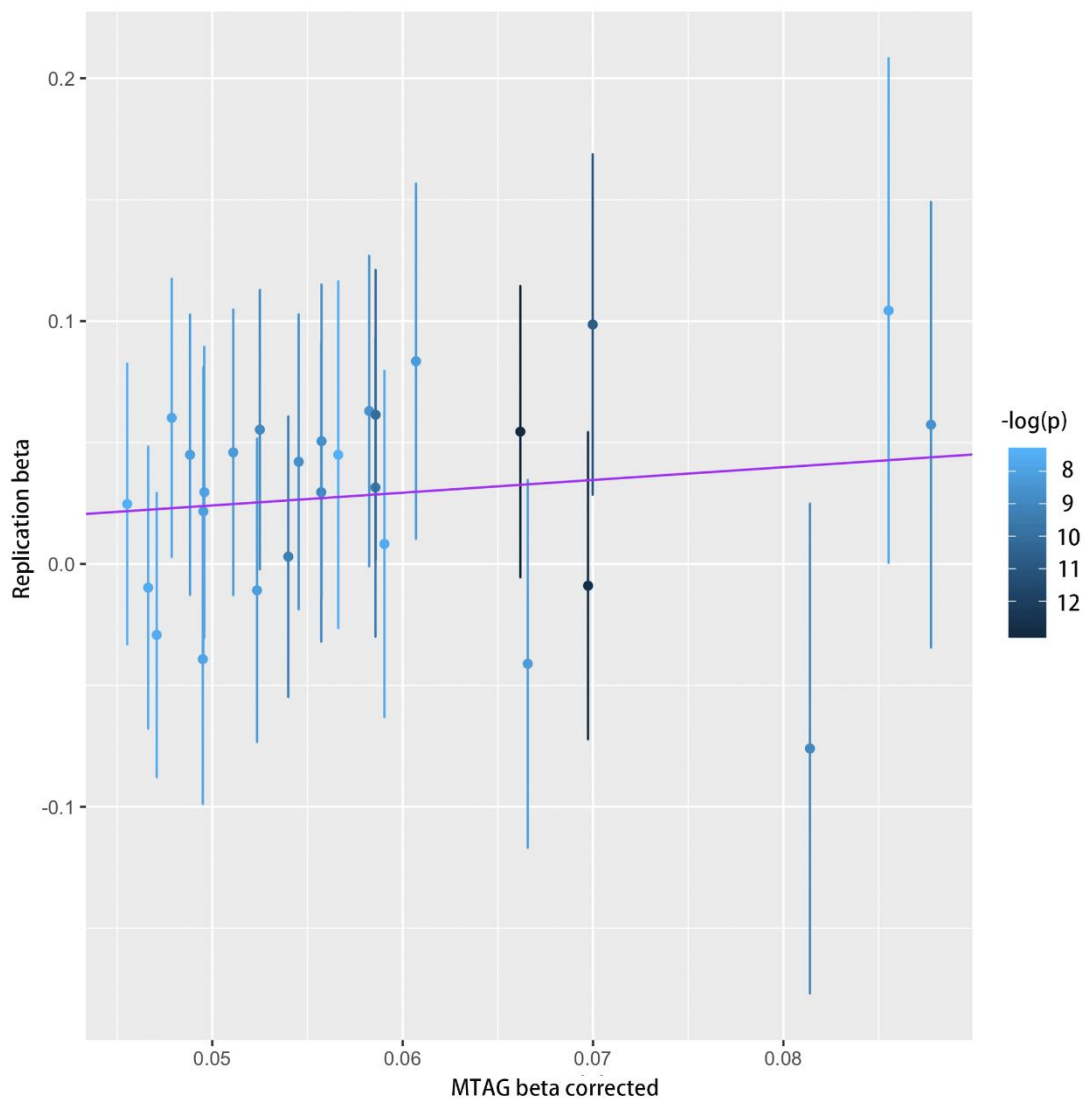

Supplement: 41398_2020_1195_MOESM1_ESM.pdf [file 41398_2020_1195_MOESM1_ESM.pdf]
